# Supplementary material for: CoxNi100−x nanoparticles encapsulated by curved graphite layers: controlled in situ metal-catalytic preparation and broadband microwave absorption
Source: Royal Society of Chemistry journal article supplement (doi:10.1039/c5nr03745j), 2015-01-01
Supplement: c5nr03745j1.pdf [file c5nr03745j1.pdf]

## Supplement information

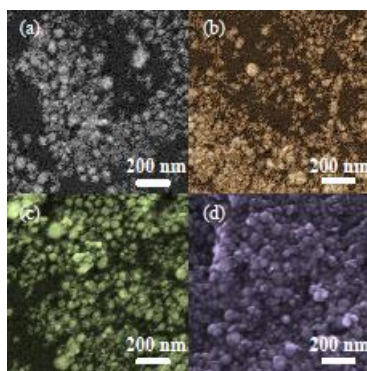

**Figure S1** (a-d) SEM images of the samples S1, S2, S3 and S4, respectively.

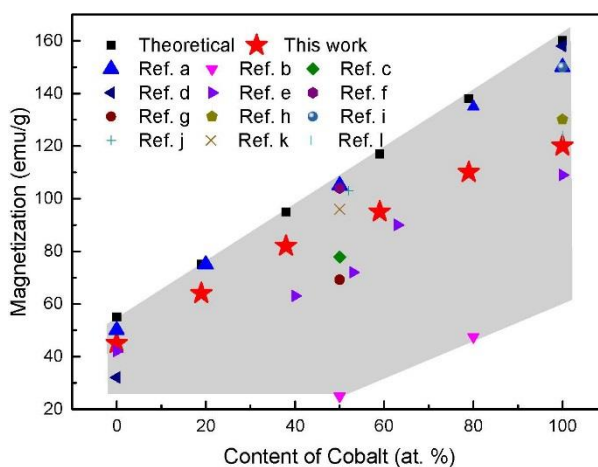

**Figure S2** The theoretical and experimental magnetization of Co, Ni and their alloys  
 in this manuscript and in literatures.

**Table SI** Co content of  $\text{Co}_x\text{Ni}_{100-x}$  nanocapsules (samples S1, S2, S3 and S4); Saturation magnetization ( $M_s$ ), Loss of  $M_s$  comparing with theoretical value, content of carbon in nanocapsules, DSC peak positions.

| Sample | Nanocapsules (at. % Co) | $M_s$ (emu/g) | Loss of $M_s$ (percent) | Content of Carbon (wt. %) | First peak of DSC (°C) | Second peak of DSC (°C) |
|--------|-------------------------|---------------|-------------------------|---------------------------|------------------------|-------------------------|
| S1     | 23                      | 64            | 14.6%                   | 7.8%                      | 261                    | 372                     |
| S2     | 42                      | 82            | 13.6%                   | 8.9%                      | 282                    | 387                     |
| S3     | 56                      | 95            | 18.7%                   | 9.3%                      | 295                    | 390                     |
| S4     | 77                      | 110           | 20.2%                   | 8.6%                      | 282                    | 383                     |

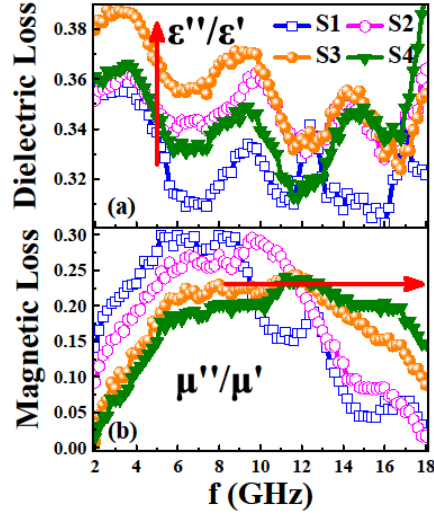

**Figure S3** Frequency dependence of (a) the dielectric loss and (b) the magnetic loss factors of the samples S1, S2, S3 and S4.

### 1. Calculation of amount of gas and the H/O ratio

The chamber volume is  $0.2 \text{ m}^3$

#### The amount of Ar

$P=0.0183 \text{ Mpa}$ ,  $V=0.2 \text{ m}^3$ ,  $R=8.314 \text{ J/(mol K)}$ ,  $T=300 \text{ K}$

$PV=nRT$

$$1.83 \times 10^4 \times 0.2 = n \times 8.314 \times 300 \rightarrow n = 1.467 \text{ mol}$$

#### The amount of H<sub>2</sub>

$P=0.0037 \text{ Mpa}$ ,  $V=0.2 \text{ m}^3$ ,  $R=8.314 \text{ J/(mol K)}$ ,  $T=300 \text{ K}$

$PV=nRT$

$$3.7 \times 10^3 \times 0.2 = n \times 8.314 \times 300 \rightarrow n = 0.297 \text{ mol}$$

#### The amount of C<sub>2</sub>H<sub>6</sub>O

$V=30 \text{ ml (volume)}$ ,  $M=46 \text{ g/mol (Mole mass)}$ ,  $\rho=0.789 \text{ g/cm}^3 \text{ (density)}$

$$n = \rho \times V / M = 0.515 \text{ mol}$$

#### The ratio of H to O

$$r = \text{H/O} = (0.297 \times 2 + 0.515 \times 6) / 0.515 = 7.15$$

### 2. Calculation of magnetization difference

$M_{\text{Co}}=160 \text{ emu/g}$ ;  $M_{\text{Ni}}=55 \text{ emu/g}$

#### Theoretical magnetization

$$M_{\text{S1T}} = 0.19 \times 160 + 0.81 \times 55 = 74.95 \text{ emu/g}$$

$$M_{\text{S2T}} = 0.38 \times 160 + 0.62 \times 55 = 94.9 \text{ emu/g}$$

$$M_{\text{S3T}} = 0.59 \times 160 + 0.41 \times 55 = 116.95 \text{ emu/g}$$

$$M_{\text{S4T}} = 0.79 \times 160 + 0.21 \times 55 = 137.95 \text{ emu/g}$$

### The difference of magnetization between theoretical and experimental

$M_{S1E} = 64$  emu/g,  $M_{S2E} = 82$  emu/g,  $M_{S3E} = 95$  emu/g,  $M_{S4E} = 110$  emu/g,

$\Delta M_{S1} = (M_{S1T} - M_{S1E}) / M_{S1T} = 14.6\%$

$\Delta M_{S2} = (M_{S2T} - M_{S2E}) / M_{S2T} = 13.6\%$

$\Delta M_{S3} = (M_{S3T} - M_{S3E}) / M_{S3T} = 18.7\%$

$\Delta M_{S4} = (M_{S4T} - M_{S4E}) / M_{S4T} = 20.2\%$

### 3. Calculation of carbon mass content

$$\left\{ \begin{array}{l} X/Y = \text{mole ratio of Co and Ni atom in nanocapsules} \\ X * \text{Co} + Y * \text{Ni} + C = \text{nanocapsules mass before DSC} \\ X * \text{CoO}_{4/3} + Y * \text{NiO} = \text{sample mass after DSC} \end{array} \right.$$

$C_{S1} = 7.8\%$

$C_{S2} = 8.9\%$

$C_{S3} = 9.3\%$

$C_{S4} = 8.6\%$

### Notes and references

- a. G. Viau, F. Fievet-Vincent, F. Fievet, P. Toneguzzo, F. Ravel and O. Acher, *J. Appl. Phys.*, 1997, **81**, 2749-2754.
- b. S. Sharma, N.S. Gajbhiye and R.S. Ningthoujam, *J. Colloid Interface Sci.*, 2010, **351**, 323-329.
- c. H. Li, J.Y. Liao, Y.F. Feng, S.W. Yu, X.B. Zhang and Z. Jin, *Mater. Lett.*, 2012, **67**, 46-348.
- d. A.A. El-Gendy, E.M.M. Ibrahim<sup>1</sup>, V.O. Khavrus, Y. Krupskaya, S. Hampel, A. Leonhardt, B. Büchner and R. Klingeler, *Carbon*, 2009, **47**, 2821-2828.
- e. S. Panday, B. S.S. Daniel and P. Jeevanandam, *J. Magn. Magn. Mater.*, 2011, **323**, 2271-2280.
- f. Y.J. Zhang, S.-W. Orl and Z.D. Zhang, *Adv. Mater. Phys. Chem.*, 2011, **1**, 7-13.
- g. W.H. Lu, D.B. Sun and H.Y. Yu, *J. Alloys. Compd.*, 2013, **546**, 229-233.
- h. Z. Ma, Q.F. Liu, J. Yuan, Z.K. Wang, C.T. Cao and J.B. Wang, *Phys. Status Solidi B*, 2012, **249**, 575-580.
- i. S. L. Wen, Y. Liu, X. C. Zhao and J. W. Cheng, *J. Appl. Phys.*, 2014, **116**, 054310-1-5.
- j. X.-W. Wei, X.-M. Zhou, K.-L. Wu and Y. Chen, *Cryst. Eng. Comm.*, 2011, **13**, 1328-1332.
- k. L.-P. Zhu, H.-M. Xiao and S.-Y. Fu, *Eur. J. Inorg. Chem.*, 2013, **2007**, 3947-3951.
- l. Robert N. Grass and Wendelin J. Stark, *J. Mater. Chem.*, 2006, **16**, 1825-1830.
